# Supplementary material
Source: Springer Nature journal article supplement (https://www.springermedizin.de/resource/supplementary/12879_2009_1066_MOESM3_ESM.pdf/9442504)

Tau 2

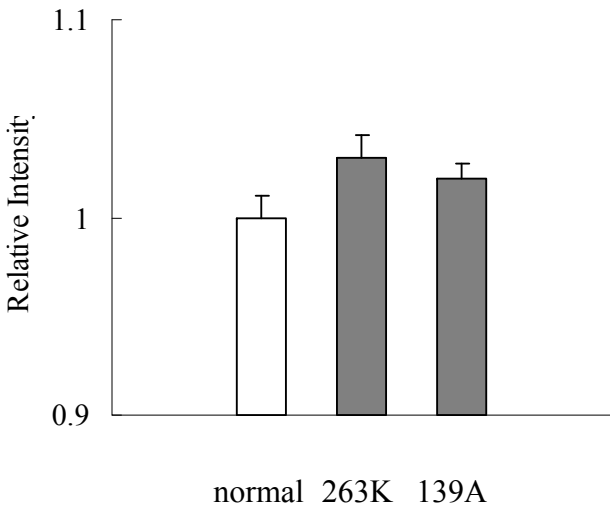

Tau 4

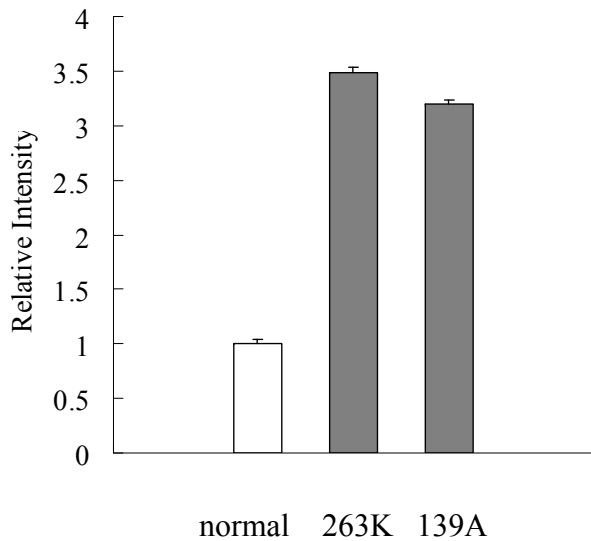

Supplement: MOESM3 [file 9442504]
